# Supplementary material
Source: Research Square preprint supplement (doi:10.21203/rs.3.rs-8908152/v1)
Supplement: Supplementary file 1 [file 4c1ceed582768409b50f7d85.docx]

**Informed Consent Form for Participation in the Study: …………………**

Dear Sir/Madam,

You are hereby invited to participate in the above-mentioned research study. The necessary information regarding this study is provided in this document, and you are free to decide whether or not to participate.

You are not required to make an immediate decision. You may ask any questions you have from the research team and consult anyone you wish before deciding. Before signing this informed consent form, please make sure you have clearly understood all the information provided and that all your questions have been answered.

**Principal Investigator: …………………………………**

**I understand that the objectives of this research are as follows:**

………………………………………………………………………………………………
………………………………………………………………………………………………

**I understand that my participation in this research is completely voluntary, and I am under no obligation to take part.**

I have been assured that if I choose not to participate, I will not be deprived of any routine diagnostic or therapeutic care, and my therapeutic relationship with the healthcare center or my treating physician will not be affected.

I understand that even after agreeing to participate, I may withdraw from the study at any time by informing the investigator, and withdrawal will not result in loss of access to routine medical services.

**My participation in this study will involve the following procedures:**

………………………………………………………………………………………………
………………………………………………………………………………………………

**The potential benefits of participating in this study for me are:**

………………………………………………………………………………………………
………………………………………………………………………………………………

**The potential risks or adverse effects of participating in this study are:**

………………………………………………………………………………………………
………………………………………………………………………………………………

**If I choose not to participate, the standard method of treatment will be offered to me, whose benefits and risks are as follows:**

………………………………………………………………………………………………
………………………………………………………………………………………………

**I understand that all information related to me will be kept confidential by the study team and that only aggregated results of the study may be published, without mentioning my name or identifying information.**

I understand that the Research Ethics Committee, for the purpose of protecting my rights, may access my information.

**I understand that I will not be required to pay any costs related to the research interventions described below:**

………………………………………………………………………………………………
………………………………………………………………………………………………

**Mr./Ms. …………………………** was introduced to me as the contact person responsible for answering my questions. I was instructed to contact them whenever I have any concerns or questions regarding participation in this study.

Their address and telephone numbers were provided to me as follows:

**Address:** ……………………………………………………………………………………………
**Landline:** ………………………………………………………
**Mobile:** …………………………………………………………

**I understand that if any physical or psychological harm occurs to me during or after the study as a result of participation, the investigator is responsible for providing treatment for the complications, covering all related costs, and compensating for the damages.**

I am aware that if I have any complaints or objections regarding the research staff or the conduct of the study, I may contact the Research Ethics Committee of …………… University at the following address: …………… and submit my concerns verbally or in writing.

This Information and Informed Consent Form has been prepared in two copies. After signing, one copy will be given to me and the other will be kept by the investigator.

**I declare that I have read and understood all the above information and, based on this understanding, willingly give my informed consent to participate in this research study.**

**Participant’s Signature:** ___________________________

**I, …………………………………., commit to fulfilling all responsibilities of the investigator as outlined above and to ensure the protection of the rights and safety of the participant in this research.**

**Stamp and Signature of Principal Investigator**
